# Supplementary material for: “I felt good knowing my blood glucose level”: Women’s perspectives on gestational diabetes mellitus screening services during antenatal care in Tanzania
Source: Research Square preprint supplement (doi:10.21203/rs.3.rs-7865411/v1), 2025-11-19
Supplement: Supplementary file 1 [file 734d10bb14bef6d91de5eaa8.docx]

Linkage between the build-up of categories and the content areas of the social ecological model

| **Codes** | **Content areas** | **Sub-categories** | **Categories** |
| --- | --- | --- | --- |
| Nutritional counselling is partially provided for women who have tested positive for GDM | Partial nutritional counselling | i.  Quality of health education provided during ANC | 1. The experience of receiving GDM services during ANC |
| Health education provided was perceived not to be comprehensive enough by women | Group health education provision |
| Group health education is only provided for first-time attendees to the ANC clinic |
| Group health education was not provided at all during ANC |
| Group health education at the ANC is only provided in the early morning |
| Perception of greater emphasis being put on anemia during ANC |
| Other health education topics covered during ANC group health education sessions |
| GDM topic is only covered by the research team at the ANC group health education sessions |
| Nutrition topic is partly covered when group health education is provided at ANC | Partial nutritional counselling |
| No prior experience of being screened for GDM during ANC clinic | First time GDM testing | ii. GDM screening test during ANC clinic |
| Limited explanation provided to women for the GDM test done | Pre-test counselling |
| Fear of doing the gestational diabetes screening test during ANC clinic | Perception of test and test results |
| Women experiencing anxiety when doing the GDM screening test |
| Women’s perception of doing a GDM screening test |
| Access for women to be attended by a specialist when screened positive for GDM | Access to a specialist | iii. Care provided after receiving GDM screening test results |
| The cost of attending a specialist was a limitation to access specialized care | Consultation fee |
| Women's receptivity of the GDM test results during ANC | Perception of the test and test results |
| Family reaction after the screening test results | Family reaction to test results |
| Lifestyle modification to improve diet and physical activity | Lifestyle adaptation | iv. Influence on women’s daily life |
| Personal struggles in adapting to dietary modification during pregnancy |
| Financial limitations to dietary modification during pregnancy |
| Perceived health benefits after dietary modification | Dietary change benefits |
| Perceived need for all women attending other facilities to be screened for gestational diabetes mellitus | GDM care for all |
| Perceived need for community sensitization on gestational diabetes mellitus | ↓ GDM sensitization |
| Perceived improvement in the overall satisfaction with antenatal care services provided | Service satisfaction |
| Perceived need for male engagement in gestational diabetes mellitus screening services | ↑ Male engagement |
| Improve the time spent in counselling women about GDM | ↑ Time for counselling | i. Quality of health education | 2. Women suggestions for improving the provision of GDM services within ANC |
| Health education on GDM should be consistently provided to women throughout ANC. | Group health education provision |
| Develop and hand out brochures to supplement the health education on GDM during ANC | Provide leaflets |
| Provide GDM information within the group health education sessions during ANC clinic | GDM should be part of health education |
| Willingness of women to do fasting blood glucose for gestational diabetes mellitus screening during ANC | Willingness to FBG (Test willingness) | ii. Test   used for GDM screening |
| Suggested adaptations for fasting blood glucose test to be possible during ANC clinic | Adaptations for FBG |
| Willingness to use an Oral glucose tolerance test for GDM screening during ANC | Willingness to OGTT (Test willingness) |
| Improve the quality of information given before laboratory tests for GDM | Provide pre- and post-test counselling | iii. Care provided after the test results |
| Improve the disclosure of the GDM test results during ANC |
| Provision of detailed counselling related to the GDM test results |
| Suggested price that women are willing to pay for a specialist consultation following a positive GDM screening test | ↓ Consultation fee | iv. Fee for GDM care services |
| Suggested price that women are willing to pay for the GDM screening tests | Waive test fee |
| Waive cost for seeing a specialist for those who test positive for GDM | Waive consultation fee |

ANC – Antenatal care; FBG – Fasting blood glucose; GDM – Gestational diabetes mellitus; ↓ - Decrease; ↑ - Increase
